# Supplementary material for: Common Variants Show Predicted Polygenic Effects on Height in the Tails of the Distribution, Except in Extremely Short Individuals
Source: PLoS Genet. 2011 Dec 29;7(12):e1002439. doi: 10.1371/journal.pgen.1002439 (PMC3248463; doi:10.1371/journal.pgen.1002439)
Supplement: Table S2 — Individual SNP analysis for FINRISK cohort. The table shows the results for the SNPs used in the individual association analysis in the FINRISK cohort. (XLS) [file pgen.1002439.s009.xls]

## Sheet: Sheet1
markername	chr	position_hg18	closest gene	effect allele (GIANT Stage 1 height increasing allele)	GIANT Stage 1 beta	FINRISK effect allele frequency	FINRISK OR	lower 95% CI OR	upper 95% CI OR	expected OR	Observed OR > Expected OR	Effect Direction Consistent with GIANT
rs425277	1	2069172	PTCH1/FANCC	T	0.024	0.3029	1.177	0.864434	1.60259	1.13815	yes	yes
rs2284746	1	17306675	FAM46A	A	0.0354	0.5214	1.521	1.1286	2.04984	1.21035	yes	yes
rs1738475	1	23536891	NPR3	C	0.0216	0.613	1.14025	0.84842	1.53246	1.12352	yes	yes
rs4601530	1	24916698	FUBP3	A	0.0238	0.2729	1.24595	0.903374	1.71844	1.13692	yes	yes
rs2154319	1	41745770	OR2J3	T	0.0335	0.7446	1.183	0.833783	1.67848	1.19799	no	yes
rs17391694	1	78623626	SLC38A9	T	0.0399	0.1177	2.312	1.50762	3.54554	1.24004	yes	yes
rs6699417	1	89123443	SBNO1	T	0.0217	0.6606	0.751315	0.5348	1.05549	1.12412	no	no
rs10874746	1	93323971	DNM3	T	0.0217	0.3619	0.980392	0.726821	1.32243	1.12412	no	no
rs9428104	1	118855587	ADAMTS10	C	0.0375	0.2249	1.08814	0.77948	1.51902	1.22412	no	yes
rs11205277	1	149892872	TGFB2	G	0.0452	0.621	1.758	1.286	2.40323	1.27608	yes	yes
rs17346452	1	172053287	WWC2	A	0.038	0.7727	1.372	0.9703	1.94	1.22743	yes	yes
rs1325598	1	175058872	RTF1	T	0.0256	0.4464	1.12183	0.836743	1.50405	1.14802	no	yes
rs1046934	1	184023529	SCMH1	C	0.0459	0.627	1.47	1.09485	1.97369	1.28091	yes	yes
rs10863936	1	212237798	SF3B4	G	0.022	0.525	1.103	0.827008	1.4711	1.12594	no	yes
rs6684205	1	218609702	CCDC53/GNPTAB	A	0.0328	0.6723	1.157	0.850463	1.57402	1.19348	no	yes
rs11118346	1	219743719	TSEN15	C	0.0264	0.4963	1.301	0.966489	1.75129	1.15298	yes	yes
rs10799445	1	227911883	SPAG17	A	0.0306	0.7188	1.72503	1.25077	2.37913	1.1794	yes	yes
rs4665736	2	25187599	PPIF	T	0.0335	0.592	1.21996	0.896504	1.66011	1.198	yes	yes
rs6714546	2	33361425	LTBP1	C	0.0254	0.2779	1.52835	1.08175	2.15934	1.14678	yes	yes
rs17511102	2	37960613	CEP120	A	0.0601	0.9039	2.047	1.02776	4.07703	1.38281	yes	yes
rs2341459	2	44768202	ZBTB24	T	0.0276	0.3073	1.592	1.1759	2.15533	1.16047	yes	yes
rs3791675	2	56111309	BNC2	G	0.0496	0.2468	1.25094	0.883561	1.77107	1.30672	no	yes
rs11684404	2	88924622	DNAJC27	C	0.027	0.6453	0.8919	0.66641	1.19369	1.15672	no	no
rs7567288	2	134151294	IGF1R	G	0.0309	0.7524	1.049	0.761885	1.44431	1.1813	no	yes
rs1351164	2	217980143	RYBP	T	0.0279	0.7494	1.61943	1.13644	2.30771	1.16234	yes	yes
rs12470505	2	219908369	NCKAP5	T	0.0483	0.8838	1.36968	0.864037	2.17122	1.29753	yes	yes
rs2629046	2	225047744	GPR126	T	0.0247	0.5463	1.11334	0.831816	1.49014	1.14246	no	yes
rs2580816	2	232797966	C6orf173	C	0.0412	0.1985	1.64853	1.10509	2.45922	1.24879	yes	yes
rs12694997	2	241911659	NPPC	C	0.0274	0.2443	0.883392	0.606206	1.28732	1.15921	no	no
rs2597513	3	13555836	L3MBTL3	C	0.0392	0.8847	0.7707	0.466392	1.27356	1.23537	no	no
rs13088462	3	51071713	DOCK3	C	0.0543	0.916	1.022	0.500126	2.08844	1.34019	no	yes
rs2336725	3	53093779	LIN28B	C	0.0263	0.5481	1.477	1.10283	1.97812	1.15236	yes	yes
rs9835332	3	56642722	GDF5	A	0.0217	0.4835	1.03466	0.774905	1.38149	1.12412	no	yes
rs9863706	3	72437413	KCNE2	A	0.0304	0.2085	0.982318	0.677619	1.42403	1.17812	no	no
rs9844666	3	135974216	ZNFX1	G	0.0284	0.2341	0.993049	0.689002	1.43127	1.16548	no	no
rs724016	3	142588510	C2CD4A	C	0.067	0.5837	1.583	1.1827	2.11878	1.4356	yes	yes
rs572169	3	172165727	SERPINH1	T	0.0355	0.3258	1.061	0.782427	1.43875	1.21099	no	yes
rs720390	3	185548683	CYP19A1	A	0.0305	0.4261	1.165	0.865801	1.56759	1.17877	no	yes
rs2247341	4	1671115	HMGA1	A	0.0251	0.3955	0.955	0.709709	1.28507	1.14493	no	no
rs6449353	4	18033488	ETV6	T	0.0714	0.87	1.39978	0.843795	2.3221	1.46983	no	yes
rs17081935	4	57823476	TET2	T	0.0306	0.2239	1.001	0.62492	1.60341	1.17939	no	yes
rs7697556	4	73515313	CTU2/GALNS	T	0.0219	0.4871	1.489	1.11337	1.99136	1.12534	yes	yes
rs10010325	4	106106353	PRKCZ	A	0.0214	0.4534	1.12	0.835859	1.50073	1.12231	no	yes
rs7689420	4	145568352	MKL2	G	0.0687	0.1893	1.80701	1.18749	2.74974	1.44865	yes	yes
rs955748	4	184215675	BMP2	A	0.0243	0.2438	0.874126	0.621159	1.23011	1.13999	no	no
rs1173727	5	32830521	LTBP1	T	0.0356	0.3836	1.469	1.10009	1.96162	1.21165	yes	yes
rs11958779	5	55001899	EFEMP1	T	0.0282	0.724	0.8875	0.64079	1.22919	1.16423	no	no
rs10037512	5	88354675	MFAP2	T	0.0267	0.5763	1.44613	1.08201	1.93279	1.15485	yes	yes
rs1582931	5	122657199	SLBP/FGFR3	G	0.0254	0.4932	0.932836	0.69887	1.24513	1.14678	no	no
rs274546	5	131727766	TULP4	A	0.0278	0.4457	1.584	1.18481	2.11769	1.16172	yes	yes
rs526896	5	134384604	SSSCA1	T	0.0315	0.7157	1.26534	0.89123	1.7965	1.18514	yes	yes
rs4282339	5	168256240	ZNF462	G	0.0352	0.215	0.895255	0.605095	1.32455	1.20902	no	no
rs12153391	5	171203438	EIF2AK3	T	0.0329	0.2764	1.30719	0.947274	1.80385	1.19412	yes	yes
rs889014	5	172984114	MC4R	T	0.029	0.4014	1.16645	0.868892	1.56592	1.16927	no	yes
rs422421	5	176517326	PTPDC1	G	0.0332	0.2222	1.18906	0.735428	1.92251	1.19605	no	yes
rs6879260	5	179731014	PDS5B/BRCA2	T	0.0281	0.381	1.37722	1.0243	1.85174	1.1636	yes	yes
rs3812163	6	7670759	PCSK5	A	0.0366	0.5671	1.075	0.803048	1.43905	1.21821	no	yes
rs1047014	6	19949472	PKN2	C	0.0291	0.7461	1.193	0.812045	1.75267	1.16989	yes	yes
rs806794	6	26200677	KCNJ16/KCNJ2	A	0.0528	0.6448	1.2108	0.904466	1.62089	1.32953	no	yes
rs3129109	6	29084232	PEX2	A	0.0257	0.3693	0.878735	0.64168	1.20336	1.14864	no	no
rs2256183	6	31380529	PPARD/FANCE	A	0.0345	0.3711	1.29	0.959432	1.73446	1.20448	yes	yes
rs2780226	6	34199092	TWISTNB	T	0.079	0.9219	1.191	0.60869	2.33038	1.53127	no	yes
rs9472414	6	44946506	SMOX	T	0.0306	0.2207	0.917431	0.634094	1.32737	1.17939	no	no
rs9360921	6	76265642	INSR	G	0.0479	0.8497	1.825	1.18034	2.82175	1.29475	yes	yes
rs310405	6	81800362	CDK6	A	0.03	0.4841	1.398	1.04767	1.86548	1.17559	yes	yes
rs7759938	6	105378954	KCNJ12	G	0.042	0.7065	1.484	1.09488	2.01142	1.25422	yes	yes
rs1046943	6	109783941	GIPC2	A	0.0223	0.5343	0.963391	0.720824	1.28759	1.12777	no	no
rs961764	6	117522156	ZNF341	G	0.0228	0.4091	1.4708	1.0981	1.97001	1.13081	yes	yes
rs1490384	6	126851160	GHSR	T	0.037	0.4879	1.11	0.831274	1.48218	1.22084	no	yes
rs6569648	6	130349119	SOCS2	T	0.0358	0.7641	1.258	0.882479	1.79332	1.21294	yes	yes
rs7763064	6	142797289	ANKRD13B	G	0.0445	0.2876	1.91571	1.33564	2.74771	1.27125	yes	yes
rs543650	6	152110943	RHOD	C	0.0318	0.4677	1.34409	1.00335	1.80053	1.18707	yes	yes
rs9456307	6	158929442	MYO9B	T	0.0499	0.0654	1.48258	0.473052	4.64652	1.30874	yes	yes
rs798489	7	2801803	NOG	A	0.0515	0.33	1.1885	0.880262	1.60466	1.32023	no	yes
rs4470914	7	19616522	PAPPA	T	0.0328	0.168	1.218	0.787393	1.88409	1.19346	yes	yes
rs12534093	7	23502974	TNS1	T	0.0298	0.2012	1.239	0.849545	1.807	1.17431	yes	yes
rs1708299	7	28189946	HHIP	A	0.0417	0.3195	0.9501	0.696078	1.29682	1.25219	no	no
rs6959212	7	38128326	DLEU7	G	0.0229	0.2963	0.931966	0.663635	1.30879	1.13142	no	no
rs42235	7	92248076	SPIN1	T	0.0548	0.321	1.325	0.956956	1.83459	1.34396	no	yes
rs822552	7	148650634	DYM	G	0.0302	0.7382	1.216	0.874617	1.69063	1.17685	yes	yes
rs7460090	8	57194163	ADAMTSL3	T	0.0546	0.8573	1.2273	0.730173	2.06287	1.34241	no	yes
rs6473015	8	78178485	STAT2	G	0.032	0.7427	1.408	0.97465	2.03403	1.18834	yes	yes
rs6470764	8	130725665	CCDC91	C	0.0469	0.188	1.21153	0.795392	1.8454	1.2878	no	yes
rs12680655	8	135637337	SERPINE2	C	0.0298	0.5482	1.207	0.902923	1.61348	1.17433	yes	yes
rs7864648	9	16358732	PIP4K2B	T	0.0246	0.3492	1.176	0.872836	1.58446	1.14184	yes	yes
rs11144688	9	78542286	DTL	A	0.0548	0.1242	0.907441	0.574783	1.43263	1.34384	no	no
rs7853377	9	86552205	LRRC37B	A	0.0256	0.7622	1.875	1.28218	2.74191	1.14801	yes	yes
rs2778031	9	90835726	GNA12	T	0.0273	0.2283	1.254	0.895165	1.75668	1.15859	yes	yes
rs1257763	9	96893945	CCDC108/IHH	A	0.0685	0.0576	1.168	0.554468	2.46042	1.44686	no	yes
rs473902	9	98256235	CPN1	T	0.0741	0.9042	1.08167	0.661047	1.76992	1.49134	no	yes
rs7027110	9	108638867	GPC5	A	0.0337	0.2294	0.9809	0.693656	1.38709	1.19928	no	no
rs751543	9	119122342	ADAMTS17	T	0.0287	0.7279	1.22639	0.886981	1.69568	1.16737	yes	yes
rs7466269	9	133464084	ACAN	A	0.0359	0.5965	1.02881	0.758715	1.39505	1.21362	no	yes
rs7849585	9	138251691	ATAD5/RNF135	T	0.0324	0.3193	1.062	0.774341	1.45652	1.19091	no	yes
rs7909670	10	12918764	ACBD4	C	0.0219	0.4582	1.02428	0.766008	1.36962	1.12534	no	yes
rs2145998	10	81121696	Histone	G	0.0252	0.5587	0.9767	0.72974	1.30724	1.14555	no	no
rs11599750	10	101805442	JMJD4	A	0.023	0.3445	1.16863	0.844411	1.61735	1.13203	yes	yes
rs2237886	11	2810731	MICA	T	0.0429	0.1067	1.583	0.91746	2.73133	1.26027	yes	yes
rs7926971	11	12698040	NME2	C	0.0244	0.5756	1.161	0.868243	1.55247	1.14061	yes	yes
rs1330	11	17316029	C3orf63	T	0.0241	0.3285	1.072	0.775964	1.48098	1.13877	no	yes
rs1814175	11	49559172	FBXW11	T	0.023	0.2972	1.308	0.977031	1.75108	1.13203	yes	yes
rs3782089	11	65336819	ZFAT	C	0.0583	0.0722	0.837521	0.417964	1.67823	1.36941	no	no
rs7112925	11	66826160	NFATC4	C	0.0229	0.3184	1.04745	0.76093	1.44185	1.13142	no	yes
rs634552	11	75282052	FLI1	T	0.0412	0.1741	1.431	0.99269	2.06284	1.24879	yes	yes
rs494459	11	118574675	TEAD1	T	0.0207	0.4064	1.133	0.8376	1.53258	1.11808	yes	yes
rs654723	11	128586155	HMGA2	A	0.0237	0.6402	1.13122	0.835236	1.5321	1.13631	no	yes
rs2856321	12	11855773	JAZF1	A	0.0298	0.6504	1.223	0.897948	1.66572	1.17432	yes	yes
rs10770705	12	20857467	RPL5	A	0.0314	0.3011	1.286	0.943025	1.75371	1.1845	yes	yes
rs2638953	12	28534415	ESR1	C	0.0356	0.7018	0.960615	0.700727	1.31689	1.21164	no	no
rs2066807	12	56740682	FGFR4/NSD1	T	0.052	0.9279	1.193	0.649678	2.1907	1.32366	no	yes
rs1351394	12	66351826	PCCB	T	0.0535	0.4914	1.44613	1.08272	1.93153	1.33459	yes	yes
rs11107116	12	93978504	PAPPA2	T	0.0524	0.2375	1.038	0.744601	1.44701	1.32662	no	yes
rs7971536	12	102373788	ZNF652	G	0.0247	0.4097	0.77821	0.580539	1.04319	1.14246	no	no
rs11830103	12	122389499	CDC42EP3	T	0.0351	0.7837	1.117	0.785608	1.58818	1.20837	no	yes
rs1809889	12	124801226	SLIT3	T	0.0315	0.3127	1.325	0.959422	1.82988	1.18514	yes	yes
rs7332115	13	33147548	PML	C	0.025	0.5771	0.921	0.687794	1.23328	1.14431	no	no
rs3118905	13	51105334	SDR16C5	T	0.052	0.3335	1.31285	0.951908	1.81066	1.3238	no	yes
rs7319045	13	92024574	MYO9A	A	0.029	0.4512	1.489	1.11493	1.98857	1.16927	yes	yes
rs1950500	14	24830850	BOD1	T	0.0323	0.2955	1.059	0.761531	1.47267	1.19026	no	yes
rs1570106	14	68813115	IGF2BP2	G	0.0256	0.2263	1.3795	0.971281	1.95929	1.14801	yes	yes
rs7155279	14	91555634	RAD51L1	C	0.0285	0.352	0.95057	0.699446	1.29186	1.16612	no	no
rs16964211	15	49317787	ADAMTS3	C	0.0511	0.0864	1.38966	0.747319	2.58411	1.31726	yes	yes
rs7178424	15	62380259	TRIP11	T	0.0235	0.5435	1.338	0.975115	1.83593	1.13509	yes	yes
rs12902421	15	72161403	SEPT2	A	0.0691	0.9459	0.9629	0.133459	6.94727	1.45154	no	no
rs5742915	15	74336633	TREH	T	0.0308	0.5558	0.9752	0.722692	1.31593	1.18068	no	no
rs11259936	15	84580582	LYPLAL1	T	0.0419	0.4678	1.82448	1.36185	2.44427	1.25356	yes	yes
rs16942341	15	89388905	POLR2B	C	0.1335	0.0532	1.90259	0.638444	5.66978	2.05516	no	yes
rs4965598	15	98577137	NUCB2	T	0.0353	0.6772	1.165	0.853858	1.58952	1.20969	no	yes
rs2871865	15	99194896	STARD3NL	C	0.0535	0.8816	1.45054	0.738258	2.85003	1.33445	yes	yes
rs1659127	16	14388305	LCORL	A	0.024	0.3504	1.091	0.805464	1.47776	1.13815	no	yes
rs8052560	16	87304743	TBX2	A	0.0392	0.7903	1.06975	0.765799	1.49433	1.23539	no	yes
rs4640244	17	21284223	CCDC3	A	0.0279	0.5888	1.24116	0.925369	1.66471	1.16235	yes	yes
rs3110496	17	24941897	PDIA4	C	0.0229	0.3577	1.01297	0.752774	1.36309	1.13142	no	yes
rs3764419	17	29164023	GSDMC	C	0.0374	0.3904	1.18287	0.875752	1.5977	1.22348	no	yes
rs17780086	17	30343282	SLC22A5	A	0.0346	0.1622	1.155	0.757609	1.76084	1.20511	no	yes
rs1043515	17	36922196	CLIC4	C	0.0219	0.4562	1.13804	0.852806	1.51869	1.12534	yes	yes
rs4986172	17	43216281	FOLH1	C	0.0283	0.3922	0.967118	0.72361	1.29257	1.16486	no	no
rs4605213	17	46599746	QSOX2	C	0.0234	0.3231	1.205	0.883989	1.64258	1.13448	yes	yes
rs2072153	17	47390014	GFPT2	C	0.0264	0.3041	0.994	0.727329	1.35845	1.15298	no	no
rs227724	17	52133816	SUPT3H/RUNX2	A	0.0272	0.6088	1.071	0.801001	1.43201	1.15797	no	yes
rs2079795	17	59496649	BMP6	T	0.0395	0.3044	1.583	1.13175	2.21417	1.23741	yes	yes
rs11867479	17	68090207	C2orf34	T	0.024	0.3351	0.9716	0.697984	1.35248	1.13815	no	no
rs9967417	18	46959500	SYN3	C	0.0381	0.623	0.9818	0.7244	1.33066	1.22811	no	no
rs17782313	18	57851097	PITX1	G	0.0249	0.8	1.147	0.800346	1.6438	1.14369	yes	yes
rs12982744	19	2177193	HDAC11	C	0.0325	0.608	1.357	1.00104	1.83953	1.19155	yes	yes
rs891088	19	7184762	DOT1L	G	0.0251	0.7003	0.9569	0.69358	1.32019	1.14492	no	no
rs4072910	19	8644031	C9orf64	G	0.0289	0.4763	1.181	0.876521	1.59125	1.16864	yes	yes
rs2279008	19	17283303	SENP6	T	0.0308	0.6835	1.44802	1.07428	1.95177	1.18067	yes	yes
rs1741344	20	4101800	MEF2C	C	0.0263	0.6382	0.9437	0.689281	1.29203	1.15236	no	no
rs2145272	20	6626218	ID4	C	0.0386	0.6865	1.417	1.01475	1.9787	1.23142	yes	yes
rs7274811	20	32333181	TLE3	A	0.0402	0.2406	1.29149	0.919142	1.81467	1.24208	yes	yes
rs143384	20	33489170	ZBTB38	G	0.0639	0.551	1.676	1.25466	2.23883	1.41174	yes	yes
rs237743	20	47903019	VGLL2	A	0.0338	0.2102	1.301	0.912563	1.85478	1.19993	yes	yes
rs2834442	21	35690786	IGF2BP3	A	0.0269	0.6714	1.15888	0.83835	1.60197	1.1561	yes	yes
rs4821083	22	31386341	KCNQ1	T	0.0332	0.8371	1.0917	0.709932	1.67877	1.19604	no	yes
