# Supplementary material for: Common Variants Show Predicted Polygenic Effects on Height in the Tails of the Distribution, Except in Extremely Short Individuals
Source: PLoS Genet. 2011 Dec 29;7(12):e1002439. doi: 10.1371/journal.pgen.1002439 (PMC3248463; doi:10.1371/journal.pgen.1002439)
Supplement: Table S3 — Meta-analysis of individual SNPs for HUNT and FINRISK cohort. The table shows the results for the SNPs used in the meta-analysis of the HUNT and FINRISK cohorts. (XLS) [file pgen.1002439.s010.xls]

## Sheet: input_sheet
SNP ID	chr	position	nearest gene	HUNT proxy SNP	R_squared	analysed_snp	analysed_giant_height_increasing_allele	GIANT_height_increasing_allele_freq	GIANT_beta	GIANT_standard_error	meta_or	meta_se	meta_p	expected_or	expected_se	p_obs_expected_difference	Observed OR > Expected OR?	Effect Direction Similar
rs425277	1	2069172	PRKCZ			rs425277	t	0.2756	0.024	0.0042	1.18517	0.101185	0.0931593	1.13649	0.022395	0.685688	Yes	Yes
rs2284746	1	17306675	MFAP2	rs6657613	0.844	rs6657613	t	0.4954	0.0328	0.0038	1.30133	0.0927254	0.00450443	1.1911	0.0202705	0.351096	Yes	Yes
rs1738475	1	23536891	HTR1D	rs2903545	1	rs2903545	t	0.5949	0.0215	0.0038	1.14976	0.0937039	0.136419	1.12144	0.0202619	0.7948	Yes	Yes
rs4601530	1	24916698	CLIC4			rs4601530	c	0.7438	0.0238	0.0042	1.10238	0.104175	0.34945	1.13528	0.0223946	0.782582	No	Yes
rs2154319	1	41745770	SCMH1	rs11209376	0.81	rs11209376	g	0.2253	0.0319	0.0045	1.26814	0.112958	0.0354679	1.18539	0.0239988	0.558986	Yes	Yes
rs17391694	1	78623626	GIPC2			rs17391694	t	0.112	0.0399	0.0067	1.56407	0.133783	0.000827474	1.23703	0.03573	0.0902543	Yes	Yes
rs6699417	1	89123443	PKN2			rs6699417	t	0.6169	0.0217	0.0038	0.97226	0.103789	0.786355	1.12264	0.0202619	0.173844	No	No
rs10874746	1	93323971	RPL5			rs10874746	c	0.6283	0.0217	0.0038	1.06409	0.0944796	0.510831	1.12264	0.0202619	0.579399	No	Yes
rs9428104	1	118855587	SPAG17	rs12731372	0.962	rs12731372	c	0.7619	0.0379	0.0044	1.18565	0.106736	0.110611	1.22393	0.0234707	0.77122	No	Yes
rs11205277	1	149892872	SF3B4			rs11205277	g	0.417	0.0452	0.0043	1.56419	0.0971665	4.1422e-06	1.27258	0.0229519	0.0387786	Yes	Yes
rs17346452	1	172053287	DNM3	rs17346473	1	rs17346473	g	0.2739	0.0365	0.0042	1.06855	0.101145	0.512114	1.21483	0.0224041	0.215539	No	Yes
rs1325598	1	175058872	PAPPA2	rs1325596	1	rs1325596	a	0.5715	0.0253	0.0038	1.17412	0.0973642	0.0992225	1.1444	0.0202644	0.796555	Yes	Yes
rs1046934	1	184023529	TSEN15			rs1046934	c	0.3563	0.0459	0.004	1.31613	0.0978316	0.00498696	1.27733	0.0213498	0.765047	Yes	Yes
rs10863936	1	212237798	DTL			rs10863936	g	0.4633	0.022	0.0037	1.12157	0.0930484	0.217584	1.12444	0.0197292	0.978567	No	Yes
rs6684205	1	218609702	TGFB2			rs6684205	g	0.2856	0.0328	0.0041	1.15103	0.0996063	0.157918	1.19109	0.021868	0.73722	No	Yes
rs11118346	1	219743719	LYPLAL1			rs11118346	c	0.5363	0.0264	0.0037	1.18674	0.0945574	0.0701965	1.15113	0.019732	0.75247	Yes	Yes
rs4665736	2	25187599	DNAJC27	rs1172294	1	rs1172294	a	0.5341	0.0334	0.0038	1.34636	0.0950212	0.00174865	1.19492	0.020271	0.219391	Yes	Yes
rs6714546	2	33361425	LTBP1	rs1545552	0.961	rs1545552	g	0.7221	0.0246	0.0045	1.35753	0.103884	0.00325711	1.14013	0.0239951	0.101658	Yes	Yes
rs2341459	2	44768202	C2orf34			rs2341459	t	0.2697	0.0276	0.0042	1.34126	0.101996	0.003994	1.15852	0.0223971	0.160733	Yes	Yes
rs3791675	2	56111309	EFEMP1			rs3791675	c	0.7665	0.0496	0.0045	1.49146	0.107665	0.000204853	1.30277	0.0240158	0.220131	Yes	Yes
rs11684404	2	88924622	EIF2AK3	rs1913671	1	rs1913671	c	0.3274	0.0268	0.0039	1.1075	0.0978299	0.296615	1.15359	0.0207978	0.683551	No	Yes
rs7567288	2	134151294	NCKAP5			rs7567288	c	0.1961	0.0309	0.0048	1.08457	0.107977	0.452146	1.17908	0.0255968	0.4515	No	Yes
rs12470505	2	219908369	CCDC108/IHH			rs12470505	t	0.9019	0.0483	0.0063	1.04934	0.155747	0.757166	1.2937	0.0336012	0.188865	No	Yes
rs2629046	2	225047744	SERPINE2	rs6761041	1	rs6761041	t	0.5474	0.0248	0.0038	1.21229	0.0920227	0.0364397	1.14135	0.0202642	0.522228	Yes	Yes
rs12694997	2	241911659	SEPT2			rs12694997	g	0.7564	0.0274	0.0044	1.00101	0.114058	0.992961	1.15728	0.023463	0.212849	No	Yes
rs2597513	3	13555836	HDAC11			rs2597513	c	0.1063	0.0392	0.0062	1.27828	0.157248	0.118449	1.23242	0.0330624	0.820147	Yes	Yes
rs13088462	3	51071713	DOCK3			rs13088462	c	0.0568	0.0543	0.0089	1.32004	0.200353	0.165788	1.33574	0.0474627	0.95421	No	Yes
rs2336725	3	53093779	RTF1			rs2336725	c	0.4562	0.0263	0.004	1.1351	0.0922444	0.169507	1.15052	0.0213319	0.886721	No	Yes
rs9835332	3	56642722	C3orf63	rs9833926	0.967	rs9833926	a	0.538	0.0216	0.0037	1.1588	0.0906221	0.103865	1.12204	0.019729	0.728138	Yes	Yes
rs9863706	3	72437413	RYBP	rs11128265	1	rs11128265	a	0.7851	0.0304	0.0046	1.15058	0.115617	0.225049	1.17594	0.0245306	0.853664	No	Yes
rs9844666	3	135974216	PCCB			rs9844666	g	0.7448	0.0284	0.0043	1.21439	0.11558	0.0928501	1.16347	0.0229306	0.716224	Yes	Yes
rs724016	3	142588510	ZBTB38			rs724016	g	0.4308	0.067	0.0037	1.54747	0.0957281	5.08911e-06	1.42974	0.0197814	0.418211	Yes	Yes
rs572169	3	172165727	GHSR			rs572169	t	0.313	0.0355	0.004	1.20895	0.0985831	0.0542604	1.20837	0.0213376	0.996268	Yes	Yes
rs720390	3	185548683	IGF2BP2			rs720390	a	0.3858	0.0305	0.004	1.20719	0.0972402	0.0528197	1.17658	0.0213347	0.796405	Yes	Yes
rs2247341	4	1671115	SLBP/FGFR3			rs2247341	a	0.3558	0.0251	0.0039	1.13222	0.0986792	0.208226	1.14318	0.020797	0.923945	No	Yes
rs6449353	4	18033488	LCORL			rs6449353	t	0.846	0.0714	0.0055	1.47653	0.15348	0.0111152	1.46349	0.0293709	0.954731	Yes	Yes
rs17081935	4	57823476	POLR2B			rs17081935	t	0.1929	0.0306	0.0047	1.005	0.112047	0.96449	1.17719	0.0250632	0.168397	No	Yes
rs7697556	4	73515313	ADAMTS3			rs7697556	t	0.4757	0.0219	0.0038	1.30708	0.0919671	0.00359288	1.12384	0.0202624	0.108731	Yes	Yes
rs10010325	4	106106353	TET2			rs10010325	a	0.49	0.0214	0.0038	1.17113	0.0927241	0.0884522	1.12085	0.0202621	0.643823	Yes	Yes
rs7689420	4	145568352	HHIP			rs7689420	c	0.8366	0.0687	0.0051	1.45408	0.131076	0.00428794	1.44255	0.0272333	0.952586	Yes	Yes
rs955748	4	184215675	WWC2			rs955748	g	0.7545	0.0243	0.0043	1.07674	0.10773	0.492524	1.13831	0.0229279	0.613655	No	Yes
rs1173727	5	32830521	NPR3	rs13154066	1	rs13154066	t	0.3938	0.035	0.0038	1.26069	0.0975564	0.0175685	1.20516	0.0202718	0.651235	Yes	Yes
rs11958779	5	55001899	SLC38A9	rs6897117	1	rs6897117	t	0.3012	0.0278	0.004	1.10368	0.105113	0.347984	1.15975	0.0213313	0.644041	No	Yes
rs10037512	5	88354675	MEF2C	rs6894139	1	rs6894139	t	0.563	0.0266	0.0038	1.28626	0.0957757	0.00857921	1.15236	0.0202654	0.261498	Yes	Yes
rs274546	5	131727766	SLC22A5			rs274546	g	0.6103	0.0278	0.0038	1.38729	0.0942475	0.000513998	1.15976	0.0202659	0.0631248	Yes	Yes
rs526896	5	134384604	PITX1			rs526896	t	0.7299	0.0315	0.0044	1.1835	0.108031	0.118872	1.18286	0.0234666	0.99611	Yes	Yes
rs4282339	5	168256240	SLIT3			rs4282339	g	0.7973	0.0352	0.0047	1.00693	0.119557	0.953969	1.20643	0.0250669	0.138934	No	Yes
rs12153391	5	171203438	FBXW11			rs12153391	c	0.7455	0.0329	0.0045	1.25018	0.105929	0.0350413	1.19173	0.0240006	0.659327	Yes	Yes
rs889014	5	172984114	BOD1			rs889014	c	0.638	0.029	0.0039	1.15669	0.0970986	0.133852	1.1672	0.0207998	0.92738	No	Yes
rs422421	5	176517326	FGFR4/NSD1			rs422421	c	0.7802	0.0332	0.0046	1.1481	0.126538	0.275085	1.19363	0.0245328	0.762846	No	Yes
rs6879260	5	179731014	GFPT2			rs6879260	c	0.607	0.0281	0.0038	1.29105	0.0941625	0.0066693	1.16161	0.0202661	0.272717	Yes	Yes
rs3812163	6	7670759	BMP6	rs12198986	0.967	rs12198986	a	0.4716	0.0359	0.0038	1.22479	0.0945673	0.0320209	1.21096	0.0202734	0.906589	Yes	Yes
rs806794	6	26200677	Histone			rs806794	a	0.7138	0.0528	0.0042	1.07688	0.0991083	0.454847	1.32524	0.0224225	0.0411247	No	Yes
rs3129109	6	29084232	OR2J3			rs3129109	c	0.6019	0.0257	0.0039	0.890688	0.096812	0.2318	1.14684	0.0207978	0.0106883	No	No
rs2256183	6	31380529	MICA	rs2596530	1	rs2596530	g	0.4517	0.0341	0.0039	1.34508	0.093937	0.00160014	1.19939	0.0208051	0.233452	Yes	Yes
rs2780226	6	34199092	HMGA1			rs2780226	c	0.0751	0.079	0.0075	1.32095	0.192682	0.14857	1.5239	0.0400271	0.467678	No	Yes
rs9472414	6	44946506	SUPT3H/RUNX2	rs12530016	1	rs12530016	g	0.7859	0.0305	0.0046	1.26459	0.116432	0.0437803	1.17657	0.0245307	0.544284	Yes	Yes
rs310405	6	81800362	FAM46A			rs310405	a	0.525	0.03	0.0038	1.19517	0.0935289	0.0566228	1.17345	0.0202681	0.848017	Yes	Yes
rs7759938	6	105378954	LIN28B			rs7759938	c	0.3191	0.042	0.0041	1.16752	0.096559	0.108715	1.25101	0.0218776	0.485376	No	Yes
rs1046943	6	109783941	ZBTB24	rs3757235	1	rs3757235	c	0.5829	0.0216	0.0038	0.933646	0.0936359	0.463408	1.12204	0.0202621	0.0550358	No	No
rs961764	6	117522156	VGLL2	rs6915129	0.933	rs6915129	c	0.5891	0.0216	0.0038	1.26024	0.0956303	0.0155764	1.12204	0.020262	0.234751	Yes	Yes
rs1490384	6	126851160	C6orf173			rs1490384	t	0.5003	0.037	0.0038	1.14932	0.0916698	0.12897	1.21809	0.0202746	0.535913	No	Yes
rs6569648	6	130349119	L3MBTL3			rs6569648	c	0.2389	0.0358	0.0044	1.25986	0.111523	0.0383275	1.2103	0.023469	0.724737	Yes	Yes
rs7763064	6	142797289	GPR126			rs7763064	g	0.7134	0.0445	0.0042	1.49679	0.109002	0.000215482	1.26781	0.0224126	0.135702	Yes	Yes
rs543650	6	152110943	ESR1			rs543650	g	0.6042	0.0318	0.0044	1.28481	0.0937143	0.00749042	1.18476	0.0234695	0.401391	Yes	Yes
rs9456307	6	158929442	TULP4	rs12206717	0.826	rs12206717	g	0.9425	0.0487	0.0085	1.01489	0.280026	0.957917	1.29644	0.0453257	0.388061	No	Yes
rs798489	7	2801803	GNA12			rs798489	c	0.7077	0.0515	0.0042	1.28819	0.0991072	0.010614	1.31607	0.0224213	0.833054	No	Yes
rs1708299	7	28189946	JAZF1			rs1708299	a	0.3051	0.0417	0.0041	1.21598	0.0996841	0.0497942	1.24901	0.0218768	0.792863	No	Yes
rs6959212	7	38128326	STARD3NL			rs6959212	c	0.6812	0.0229	0.0041	1.12333	0.101969	0.254086	1.12984	0.0218617	0.955761	No	Yes
rs42235	7	92248076	CDK6			rs42235	t	0.3116	0.0548	0.0042	1.2793	0.10485	0.018813	1.33947	0.022427	0.668176	No	Yes
rs822552	7	148650634	PDIA4			rs822552	g	0.2535	0.0302	0.0048	1.20612	0.103928	0.0713525	1.17469	0.0255984	0.805166	Yes	Yes
rs6473015	8	78178485	PEX2			rs6473015	c	0.2875	0.032	0.0042	1.2946	0.105825	0.0146901	1.18602	0.0224008	0.418039	Yes	Yes
rs6470764	8	130725665	GSDMC			rs6470764	c	0.7922	0.0469	0.0047	1.01125	0.126853	0.929736	1.28413	0.0250779	0.0646793	No	Yes
rs12680655	8	135637337	ZFAT	rs7007820	1	rs7007820	a	0.6049	0.0298	0.0038	1.17806	0.0952557	0.0853792	1.17219	0.0202675	0.959129	Yes	Yes
rs7864648	9	16358732	BNC2			rs7864648	t	0.3166	0.0246	0.0041	1.03905	0.0950036	0.686783	1.14013	0.0218628	0.340947	No	Yes
rs11144688	9	78542286	PCSK5			rs11144688	g	0.889	0.0548	0.0076	1.04612	0.145485	0.756609	1.33935	0.0405451	0.101823	No	Yes
rs7853377	9	86552205	C9orf64	rs296886	1	rs296886	g	0.2286	0.025	0.0046	1.29898	0.119749	0.0289345	1.14256	0.0245276	0.293882	Yes	Yes
rs2778031	9	90835726	SPIN1	rs2814828	1	rs2814828	t	0.2396	0.0268	0.0044	1.28969	0.106281	0.0166797	1.15358	0.0234625	0.305492	Yes	Yes
rs1257763	9	96893945	PTPDC1			rs1257763	a	0.0397	0.0685	0.0122	1.26605	0.204376	0.248396	1.4408	0.0650662	0.546625	No	Yes
rs473902	9	98256235	PTCH1/FANCC			rs473902	t	0.9216	0.0741	0.0081	1.04028	0.167424	0.813529	1.48458	0.0432249	0.0397108	No	Yes
rs7027110	9	108638867	ZNF462			rs7027110	a	0.2273	0.0337	0.0044	0.874975	0.113799	0.240537	1.19682	0.0234668	0.00702318	No	No
rs751543	9	119122342	PAPPA			rs751543	t	0.7142	0.0287	0.0044	1.16535	0.102408	0.13512	1.16533	0.0234649	0.999904	Yes	Yes
rs7466269	9	133464084	FUBP3			rs7466269	a	0.6418	0.0359	0.0039	1.24101	0.0960763	0.0246138	1.21096	0.0208055	0.803107	Yes	Yes
rs7849585	9	138251691	QSOX2	rs12338076	0.887	rs12338076	c	0.3328	0.0304	0.004	0.991905	0.101411	0.936121	1.17595	0.0213338	0.100509	No	No
rs7909670	10	12918764	CCDC3			rs7909670	c	0.5676	0.0219	0.0038	1.07317	0.0934874	0.450019	1.12384	0.0202623	0.629637	No	Yes
rs2145998	10	81121696	PPIF	rs7332	1	rs7332	g	0.5197	0.0252	0.0038	1.15976	0.0932536	0.111985	1.14379	0.0202645	0.884479	Yes	Yes
rs11599750	10	101805442	CPN1			rs11599750	c	0.6112	0.023	0.0039	1.13563	0.0981384	0.194961	1.13045	0.020796	0.963603	Yes	Yes
rs2237886	11	2810731	KCNQ1			rs2237886	t	0.109	0.0429	0.0065	1.27698	0.154222	0.11289	1.25698	0.0346653	0.920472	Yes	Yes
rs7926971	11	12698040	TEAD1	rs7937898	0.967	rs7937898	g	0.457	0.0239	0.0037	0.994315	0.0938662	0.951566	1.13589	0.0197303	0.165196	No	No
rs1330	11	17316029	NUCB2			rs1330	t	0.3495	0.0241	0.004	1.12575	0.0987294	0.230241	1.1371	0.0213296	0.920907	No	Yes
rs1814175	11	49559172	FOLH1			rs1814175	t	0.3393	0.023	0.0041	1.20658	0.0931337	0.043761	1.13045	0.021862	0.495665	Yes	Yes
rs3782089	11	65336819	SSSCA1			rs3782089	c	0.9402	0.0583	0.0084	1.01166	0.197309	0.953166	1.36454	0.0448003	0.139163	No	Yes
rs7112925	11	66826160	RHOD			rs7112925	c	0.642	0.0229	0.0039	1.14058	0.100474	0.190492	1.12984	0.0207957	0.92659	Yes	Yes
rs634552	11	75282052	SERPINH1	rs606452	1	rs606452	a	0.14	0.0397	0.0056	1.25527	0.126977	0.0733766	1.23572	0.0298663	0.904222	Yes	Yes
rs494459	11	118574675	TREH			rs494459	t	0.4033	0.0207	0.0038	1.0413	0.0933275	0.664574	1.11667	0.0202615	0.464325	No	Yes
rs654723	11	128586155	FLI1			rs654723	a	0.6117	0.0237	0.004	1.1691	0.096117	0.104059	1.13468	0.0213297	0.761437	Yes	Yes
rs2856321	12	11855773	ETV6	rs2954980	1	rs2954980	t	0.3583	0.0295	0.0039	1.15123	0.097797	0.14985	1.17032	0.0208001	0.869379	No	Yes
rs10770705	12	20857467	SLCO1C1			rs10770705	a	0.3294	0.0314	0.004	1.19235	0.0978281	0.0721278	1.18224	0.0213345	0.932211	Yes	Yes
rs2638953	12	28534415	CCDC91			rs2638953	c	0.6829	0.0356	0.004	1.28095	0.100009	0.0132947	1.20902	0.0213378	0.571983	Yes	Yes
rs2066807	12	56740682	STAT2			rs2066807	g	0.0758	0.052	0.0076	1.48659	0.186389	0.0334044	1.31947	0.0405332	0.53184	Yes	Yes
rs1351394	12	66351826	HMGA2			rs1351394	t	0.4872	0.0535	0.0037	1.36281	0.0935343	0.000934756	1.33024	0.0197608	0.800262	Yes	Yes
rs11107116	12	93978504	SOCS2			rs11107116	t	0.2232	0.0524	0.0044	1.34104	0.114801	0.0105852	1.32238	0.0234844	0.904845	Yes	Yes
rs11830103	12	122389499	SBNO1	rs12298826	0.948	rs12298826	g	0.2227	0.035	0.0064	0.946557	0.113963	0.629845	1.20515	0.0341352	0.0423357	No	No
rs1809889	12	124801226	FAM101A			rs1809889	t	0.2895	0.0315	0.0044	1.27742	0.100693	0.0150338	1.18286	0.0234671	0.457002	Yes	Yes
rs7332115	13	33147548	PDS5B/BRCA2			rs7332115	g	0.3792	0.025	0.0039	1.0256	0.0945368	0.789169	1.14257	0.0207972	0.264536	No	Yes
rs3118905	13	51105334	DLEU7	rs3118906	1	rs3118906	g	0.7128	0.0518	0.0042	1.27067	0.105358	0.0229868	1.31818	0.0224213	0.733287	No	Yes
rs7319045	13	92024574	GPC5	rs4773624	1	rs4773624	g	0.3929	0.0286	0.0039	1.24253	0.0924415	0.0188217	1.16472	0.0207999	0.4949	Yes	Yes
rs1950500	14	24830850	NFATC4			rs1950500	t	0.2974	0.0323	0.0041	1.32942	0.106577	0.00754612	1.18792	0.0218679	0.300958	Yes	Yes
rs1570106	14	68813115	RAD51L1	rs6573834	1	rs6573834	c	0.7944	0.0253	0.0046	1.15321	0.116574	0.221392	1.14439	0.0245272	0.948612	Yes	Yes
rs7155279	14	91555634	TRIP11	rs10150088	0.964	rs10150088	t	0.6152	0.027	0.0038	1.01201	0.0974472	0.902509	1.15482	0.0202653	0.184747	No	Yes
rs16964211	15	49317787	CYP19A1			rs16964211	g	0.9506	0.0511	0.0091	1.35218	0.211234	0.153187	1.31313	0.0485245	0.892455	Yes	Yes
rs7178424	15	62380259	C2CD4A			rs7178424	c	0.5437	0.0235	0.0038	1.18812	0.0951084	0.0699252	1.13347	0.0202634	0.628182	Yes	Yes
rs12902421	15	72161403	MYO9A	rs3759901	1	rs3759901	a	0.0308	0.0555	0.012	0.939701	0.392367	0.874056	1.34429	0.0639836	0.367767	No	No
rs5742915	15	74336633	PML			rs5742915	c	0.4733	0.0308	0.0041	0.936438	0.0936635	0.483209	1.17846	0.021869	0.0168447	No	No
rs11259936	15	84580582	ADAMTSL3			rs11259936	c	0.5165	0.0419	0.0037	1.48653	0.0933267	2.15734e-05	1.25036	0.0197461	0.0697228	Yes	Yes
rs16942341	15	89388905	ACAN			rs16942341	c	0.9693	0.1335	0.0131	1.43467	0.315959	0.253308	2.03803	0.0699396	0.278011	No	Yes
rs4965598	15	98577137	ADAMTS17			rs4965598	c	0.3195	0.0353	0.004	1.18597	0.102207	0.0951642	1.20709	0.0213376	0.865756	No	Yes
rs1659127	16	14388305	MKL2			rs1659127	a	0.3396	0.024	0.0043	1.06757	0.100564	0.515592	1.13649	0.0229292	0.544144	No	Yes
rs4640244	17	21284223	KCNJ12			rs4640244	a	0.6132	0.0279	0.0045	1.09268	0.0938875	0.345131	1.16038	0.0239993	0.535089	No	Yes
rs3110496	17	24941897	ANKRD13B			rs3110496	g	0.6714	0.0229	0.004	0.892049	0.0990537	0.248806	1.12984	0.0213286	0.0196872	No	No
rs3764419	17	29164023	ATAD5/RNF135			rs3764419	c	0.6078	0.0374	0.0039	1.1438	0.0959056	0.161234	1.22069	0.0208076	0.50736	No	Yes
rs17780086	17	30343282	LRRC37B	rs17780080	1	rs17780080	a	0.1543	0.0344	0.0053	1.06183	0.130266	0.645124	1.20129	0.0282635	0.35458	No	Yes
rs1043515	17	36922196	PIP4K2B			rs1043515	g	0.5446	0.0219	0.0038	1.28251	0.0917806	0.00670842	1.12384	0.0202624	0.15999	Yes	Yes
rs4986172	17	43216281	ACBD4			rs4986172	c	0.6473	0.0283	0.0041	0.995376	0.0950764	0.961121	1.16285	0.0218658	0.11093	No	No
rs2072153	17	47390014	ZNF652	rs11652146	0.848	rs11652146	g	0.3094	0.0255	0.004	0.976228	0.100599	0.810983	1.14562	0.02133	0.119731	No	No
rs227724	17	52133816	NOG	rs227723	0.851	rs227723	t	0.3188	0.0272	0.004	1.10461	0.0956065	0.298029	1.15605	0.0213312	0.642197	No	Yes
rs2079795	17	59496649	TBX2			rs2079795	t	0.3293	0.0395	0.004	1.34428	0.100456	0.00322791	1.23444	0.0213418	0.406523	Yes	Yes
rs11867479	17	68090207	KCNJ16/KCNJ2			rs11867479	t	0.3479	0.024	0.004	1.14343	0.0979732	0.171292	1.13649	0.0213295	0.951582	Yes	Yes
rs9967417	18	46959500	DYM	rs2078286	0.837	rs2078286	a	0.4241	0.0372	0.0039	1.11518	0.0943824	0.248059	1.21939	0.0208079	0.355326	No	Yes
rs17782313	18	57851097	MC4R	rs476828	1	rs476828	c	0.2397	0.0246	0.0045	1.14571	0.10902	0.212143	1.14013	0.0239944	0.965117	Yes	Yes
rs12982744	19	2177193	DOT1L	rs12980348	1	rs12980348	g	0.4055	0.0323	0.0039	1.32216	0.0977905	0.00429384	1.18793	0.020803	0.284286	Yes	Yes
rs891088	19	7184762	INSR			rs891088	g	0.2618	0.0251	0.0044	0.931665	0.107548	0.510446	1.14317	0.0234619	0.0630826	No	No
rs4072910	19	8644031	ADAMTS10	rs4542783	1	rs4542783	t	0.5629	0.0313	0.0062	1.11522	0.0964062	0.258003	1.18161	0.0330712	0.570434	No	Yes
rs2279008	19	17283303	MYO9B			rs2279008	t	0.7482	0.0308	0.005	1.20339	0.100599	0.0657031	1.17845	0.0266655	0.840519	Yes	Yes
rs1741344	20	4101800	SMOX			rs1741344	c	0.3686	0.0263	0.004	1.06729	0.0942357	0.489505	1.15052	0.0213312	0.437092	No	Yes
rs2145272	20	6626218	BMP2			rs2145272	g	0.3517	0.0386	0.004	1.30568	0.103448	0.00992744	1.22853	0.0213415	0.56419	Yes	Yes
rs7274811	20	32333181	ZNF341			rs7274811	g	0.7689	0.0402	0.0045	1.39903	0.107611	0.00180669	1.23904	0.0240059	0.270709	Yes	Yes
rs143384	20	33489170	GDF5			rs143384	g	0.4192	0.0639	0.0041	1.51837	0.0939133	8.70515e-06	1.40624	0.0219137	0.426291	Yes	Yes
rs237743	20	47903019	ZNFX1	rs1567865	1	rs1567865	t	0.2085	0.0337	0.0046	1.20481	0.109902	0.0900073	1.19682	0.0245327	0.952858	Yes	Yes
rs2834442	21	35690786	KCNE2	rs2834440	0.931	rs2834440	a	0.6239	0.0247	0.0038	1.20168	0.098166	0.0612756	1.14074	0.0202637	0.603642	Yes	Yes
rs4821083	22	31386341	SYN3			rs4821083	t	0.8348	0.0332	0.0051	1.12911	0.133178	0.361895	1.19362	0.0271968	0.682676	No	Yes
